P6586

## Brugada syndrome risk stratification - Evaluation of clinical and ECG risk markers in a multicenter international primary prevention cohort

S. Honarbakhsh<sup>1</sup>, R. Providencia<sup>1</sup>, J. Garcia-Hernandez<sup>2</sup>, C.A. Martin<sup>3</sup>, R.J. Hunter<sup>1</sup>, W.Y. Lim<sup>1</sup>, C. Kirkby<sup>1</sup>, A. Sharifzadehgan<sup>4</sup>, C. Waldmann<sup>4</sup>, E. Marijon<sup>4</sup>, C. Munoz-Esparza<sup>5</sup>, J. Lacunza<sup>5</sup>, J.R. Gimeno-Blanes<sup>5</sup>, P.D. Lambiase<sup>1</sup>

<sup>1</sup>Barts Health NHS Trust, Electrophysiology, London, United Kingdom; <sup>2</sup>University College London, Farr Research Institute, London, United Kingdom; <sup>3</sup>Papworth Hospital NHS Trust, Electrophysiology, Cambridge, United Kingdom; <sup>4</sup>European Hospital Georges Pompidou, Electrophysiology, Paris, France; <sup>5</sup>Hospital Clínico Universitario Virgen de la Arrixaca, Electrophysiology, Murcia, Spain  
On behalf of The Brugada Syndrome Risk Investigators

**Background:** Risk stratification for sudden cardiac death (SCD) in Brugada syndrome (BrS) is a significant challenge.

**Purpose:** To evaluate the importance of clinical and ECG factors in the likelihood of developing significant ventricular arrhythmias (VAs)/SCD in BrS patients.

**Methods:** VA occurrence during follow-up were assessed and the role of 16 proposed clinical or ECG risk markers evaluated in a multicenter international study of BrS patients and no history of cardiac arrest. Markers with predictive power were identified and incorporated into a risk score model.

**Results:** Across 15 international centers, 1084 patients were included. During a follow-up of 5.3 years (IQR 2.7–9.0 years) 110 patients had VA occurrence (10.1%) with an annual event rate of 1.7% (95% CI 1.4–2.0). Of the 16 proposed risk factors, diagnosis by family screening of sudden cardiac death (HR 4.65;  $p < 0.001$ ), probable arrhythmia related syncope (HR 3.88,  $p < 0.001$ ), type 1 spontaneous ECG (HR 3.56;  $p < 0.001$ ), Early Re-

polarisation (HR 3.15;  $p < 0.001$ ) and type 1 Brugada pattern in peripheral leads (HR 2.42;  $p < 0.001$ ) were associated with a higher VA occurrence risk during follow-up. These 5 variables were incorporated into a risk score model whereby each variable was allocated a point score based on the variable's predictive strength. The total points obtained from the model for a patient could then be translated into the predicted VA occurrence risk during follow-up (Figure 1). The model showed a sensitivity of 63.5% (95% CI 50.0–76.9) and specificity of 84.2% (95% CI 81.1–87.1) in predicting VA occurrence at 5-years follow-up. The model showed a greater discriminative power compared to an existing model (AUC 0.83 vs. 0.71;  $p < 0.001$ ).

**Conclusions:** This multicenter study with longest reported follow-up to date identified 5 risk markers for VA occurrence. Utilizing these markers in a risk score model can aid BrS risk stratification to enable individualized risk prediction and ICD prescription.

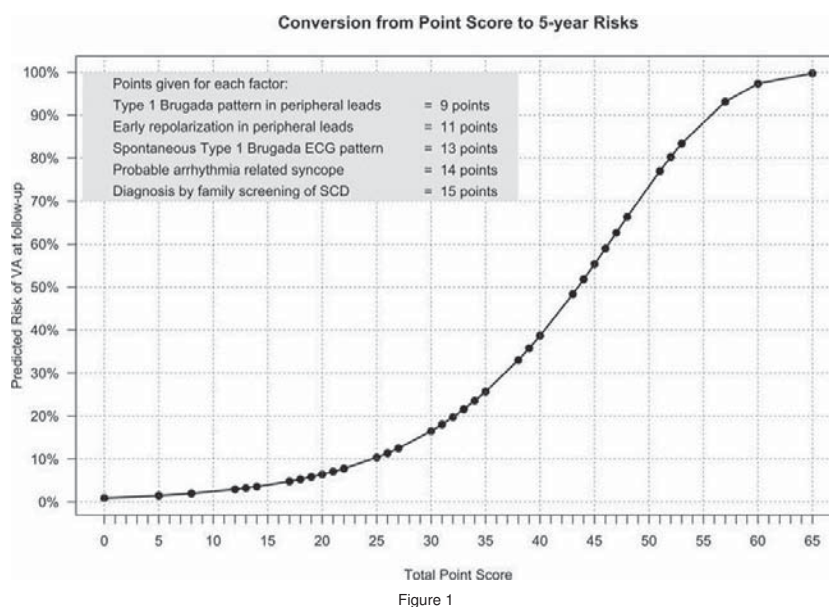

Source: http://academic.oup.com/eurheartj/article-pdf/40/Supplement_1/ehz746.1174/30203130/ehz746.1174.pdf
